# Supplementary material for: Identification of significant genes with invasive promotion in non-functional pituitary adenoma via bioinformatical analysis
Source: Research Square preprint supplement (doi:10.21203/rs.3.rs-146994/v1), 2021-01-19
Supplement: Supplementary file 1 [file 071deb16f703a402c26f1322.xlsx]

## Sheet: Sheet1
Table 2 Gene ontology analysis of up-regulated differentially expressed genes in invasive NFPA
Category	Term	Count	%	P-Value	FDR
GOTERM_BP_DIRECT	GO:0010842~retina layer formation	4	0.0144368	0.00100584	1.59035
GOTERM_BP_DIRECT	GO:0045944~positive regulation of transcription from RNA polymerase II promoter	19	0.0685747	0.00359824	5.58066
GOTERM_BP_DIRECT	GO:0000122~negative regulation of transcription from RNA polymerase II promoter	15	0.0541379	0.00614684	9.35534
GOTERM_BP_DIRECT	GO:0060048~cardiac muscle contraction	4	0.0144368	0.00795552	11.9478
GOTERM_BP_DIRECT	GO:0007215~glutamate receptor signaling pathway	3	0.0108276	0.00801196	12.0276
GOTERM_BP_DIRECT	GO:0010976~positive regulation of neuron projection development	5	0.018046	0.00889005	13.2599
GOTERM_BP_DIRECT	GO:0016192~vesicle-mediated transport	6	0.0216552	0.0127679	18.5113
GOTERM_BP_DIRECT	GO:0042327~positive regulation of phosphorylation	3	0.0108276	0.0215716	29.3479
GOTERM_BP_DIRECT	GO:0001958~endochondral ossification	3	0.0108276	0.0232315	31.2333
GOTERM_BP_DIRECT	GO:0090003~regulation of establishment of protein localization to plasma membrane	2	0.00721839	0.0270877	35.433
GOTERM_BP_DIRECT	GO:0033693~neurofilament bundle assembly	2	0.00721839	0.0270877	35.433
GOTERM_BP_DIRECT	GO:0045907~positive regulation of vasoconstriction	3	0.0108276	0.034222	42.5763
GOTERM_BP_DIRECT	GO:0007259~JAK-STAT cascade	3	0.0108276	0.034222	42.5763
GOTERM_BP_DIRECT	GO:0051599~response to hydrostatic pressure	2	0.00721839	0.035954	44.195
GOTERM_BP_DIRECT	GO:0060571~morphogenesis of an epithelial fold	2	0.00721839	0.035954	44.195
GOTERM_BP_DIRECT	GO:0001501~skeletal system development	5	0.018046	0.0367006	44.8796
GOTERM_BP_DIRECT	GO:0007050~cell cycle arrest	5	0.018046	0.0401169	47.9125
GOTERM_BP_DIRECT	GO:0060219~camera-type eye photoreceptor cell differentiation	2	0.00721839	0.04474	51.7684
GOTERM_BP_DIRECT	GO:0045893~positive regulation of transcription, DNA-templated	10	0.036092	0.0463258	53.0283
GOTERM_BP_DIRECT	GO:0030049~muscle filament sliding	3	0.0108276	0.0468253	53.4186
GOTERM_BP_DIRECT	GO:0042517~positive regulation of tyrosine phosphorylation of Stat3 protein	3	0.0108276	0.0468253	53.4186
GOTERM_BP_DIRECT	GO:0030522~intracellular receptor signaling pathway	3	0.0108276	0.0468253	53.4186
GOTERM_BP_DIRECT	GO:0007399~nervous system development	7	0.0252644	0.0478132	54.1818
GOTERM_BP_DIRECT	GO:0097094~craniofacial suture morphogenesis	2	0.00721839	0.0534464	58.3144
GOTERM_BP_DIRECT	GO:2000651~positive regulation of sodium ion transmembrane transporter activity	2	0.00721839	0.0534464	58.3144
GOTERM_BP_DIRECT	GO:0007156~homophilic cell adhesion via plasma membrane adhesion molecules	5	0.018046	0.0565769	60.4572
GOTERM_BP_DIRECT	GO:0014823~response to activity	3	0.0108276	0.058414	61.6661
GOTERM_BP_DIRECT	GO:0007010~cytoskeleton organization	5	0.018046	0.0596334	62.4494
GOTERM_BP_DIRECT	GO:0072205~metanephric collecting duct development	2	0.00721839	0.062074	63.9722
GOTERM_BP_DIRECT	GO:0007268~chemical synaptic transmission	6	0.0216552	0.0687865	67.8674
GOTERM_BP_DIRECT	GO:0060236~regulation of mitotic spindle organization	2	0.00721839	0.0706235	68.8624
GOTERM_BP_DIRECT	GO:0031659~positive regulation of cyclin-dependent protein serine/threonine kinase activity involved in G1/S transition of mitotic cell cycle	2	0.00721839	0.0706235	68.8624
GOTERM_BP_DIRECT	GO:0048812~neuron projection morphogenesis	3	0.0108276	0.0708747	68.9962
GOTERM_BP_DIRECT	GO:0045471~response to ethanol	4	0.0144368	0.071092	69.1115
GOTERM_BP_DIRECT	GO:0048015~phosphatidylinositol-mediated signaling	4	0.0144368	0.0726944	69.9495
GOTERM_BP_DIRECT	GO:0043547~positive regulation of GTPase activity	10	0.036092	0.0737961	70.5133
GOTERM_BP_DIRECT	GO:0035988~chondrocyte proliferation	2	0.00721839	0.0790955	73.0891
GOTERM_BP_DIRECT	GO:0070102~interleukin-6-mediated signaling pathway	2	0.00721839	0.0790955	73.0891
GOTERM_BP_DIRECT	GO:2001223~negative regulation of neuron migration	2	0.00721839	0.0790955	73.0891
GOTERM_BP_DIRECT	GO:0007267~cell-cell signaling	6	0.0216552	0.0829975	74.8492
GOTERM_BP_DIRECT	GO:0061564~axon development	2	0.00721839	0.0874908	76.7422
GOTERM_BP_DIRECT	GO:0003334~keratinocyte development	2	0.00721839	0.0874908	76.7422
GOTERM_BP_DIRECT	GO:0040011~locomotion	2	0.00721839	0.0874908	76.7422
GOTERM_BP_DIRECT	GO:0060674~placenta blood vessel development	2	0.00721839	0.0874908	76.7422
GOTERM_BP_DIRECT	GO:0032940~secretion by cell	2	0.00721839	0.0874908	76.7422
GOTERM_BP_DIRECT	GO:0072520~seminiferous tubule development	2	0.00721839	0.0958101	79.8996
GOTERM_CC_DIRECT	GO:0045202~synapse	10	0.036092	3.88682e-05	0.0489806
GOTERM_CC_DIRECT	GO:0005886~plasma membrane	56	0.202115	0.000859487	1.07796
GOTERM_CC_DIRECT	GO:0009986~cell surface	14	0.0505287	0.00126569	1.58368
GOTERM_CC_DIRECT	GO:0005883~neurofilament	3	0.0108276	0.00217502	2.70718
GOTERM_CC_DIRECT	GO:0030424~axon	8	0.0288736	0.00401422	4.94355
GOTERM_CC_DIRECT	GO:0030018~Z disc	6	0.0216552	0.0042933	5.27873
GOTERM_CC_DIRECT	GO:0042383~sarcolemma	5	0.018046	0.00727664	8.79442
GOTERM_CC_DIRECT	GO:0005768~endosome	7	0.0252644	0.0161172	18.5193
GOTERM_CC_DIRECT	GO:0005856~cytoskeleton	9	0.0324828	0.0192824	21.7624
GOTERM_CC_DIRECT	GO:0033596~TSC1-TSC2 complex	2	0.00721839	0.0267566	28.9544
GOTERM_CC_DIRECT	GO:0005887~integral component of plasma membrane	21	0.0757931	0.0294262	31.372
GOTERM_CC_DIRECT	GO:0043234~protein complex	9	0.0324828	0.033168	34.6333
GOTERM_CC_DIRECT	GO:0001726~ruffle	4	0.0144368	0.0476435	45.9522
GOTERM_CC_DIRECT	GO:0005576~extracellular region	22	0.0794023	0.0538691	50.2405
GOTERM_CC_DIRECT	GO:0030054~cell junction	9	0.0324828	0.0560679	51.6786
GOTERM_CC_DIRECT	GO:0005925~focal adhesion	8	0.0288736	0.0637655	56.417
GOTERM_CC_DIRECT	GO:0030139~endocytic vesicle	3	0.0108276	0.0850424	67.3805
GOTERM_CC_DIRECT	GO:0005770~late endosome	4	0.0144368	0.0977211	72.6416
GOTERM_MF_DIRECT	GO:0046983~protein dimerization activity	7	0.0252644	0.00246515	3.26664
GOTERM_MF_DIRECT	GO:0008307~structural constituent of muscle	4	0.0144368	0.00647063	8.36448
GOTERM_MF_DIRECT	GO:0003779~actin binding	8	0.0288736	0.0134922	16.7053
GOTERM_MF_DIRECT	GO:0031267~small GTPase binding	3	0.0108276	0.0139328	17.2046
GOTERM_MF_DIRECT	GO:0005200~structural constituent of cytoskeleton	5	0.018046	0.0178588	21.532
GOTERM_MF_DIRECT	GO:0005516~calmodulin binding	6	0.0216552	0.0289593	32.6608
GOTERM_MF_DIRECT	GO:0019904~protein domain specific binding	6	0.0216552	0.0412038	43.2311
GOTERM_MF_DIRECT	GO:0004879~RNA polymerase II transcription factor activity, ligand-activated sequence-specific DNA binding	3	0.0108276	0.0420556	43.906
GOTERM_MF_DIRECT	GO:0015485~cholesterol binding	3	0.0108276	0.0531676	52.0562
GOTERM_MF_DIRECT	GO:0008083~growth factor activity	5	0.018046	0.0599681	56.4881
GOTERM_MF_DIRECT	GO:0005509~calcium ion binding	12	0.0433104	0.0616712	57.537
GOTERM_MF_DIRECT	GO:0001077~transcriptional activator activity, RNA polymerase II core promoter proximal region sequence-specific binding	6	0.0216552	0.0638463	58.8424
GOTERM_MF_DIRECT	GO:0044325~ion channel binding	4	0.0144368	0.0833384	68.991
GOTERM_MF_DIRECT	GO:0003707~steroid hormone receptor activity	3	0.0108276	0.0915579	72.5305
GOTERM_MF_DIRECT	GO:0000979~RNA polymerase II core promoter sequence-specific DNA binding	3	0.0108276	0.0943438	73.6426
