# Supplementary material for: Identification of significant genes with invasive promotion in non-functional pituitary adenoma via bioinformatical analysis
Source: Research Square preprint supplement (doi:10.21203/rs.3.rs-146994/v1), 2021-01-19
Supplement: Supplementary file 2 [file 0b4424e819032ac73f8bf034.xlsx]

## Sheet: Sheet1
Table 1 All 524 commonly differentially expressed genes (DEGs) were detected from GSE51618 profile datasets
DEGs	Genes Name
Up-regulated (226 in total)	PTH XIST TLCD1 GALNT13 RPRM GALNT13 ALPK2 FGF14 CALB1 DMD MAB21L1 NR2F2-AS1 NRG3 NR2F2-AS1 AFP RAB26 LRRC7 PKD1 TLN2 AGMO ANKRD24 NEFL SCN1B ZNF185 OLFM3 ANKRD24 PPFIA2 FGFR3 RASSF6 COL11A1 BLCAP MESP1 NEFL SLC39A8 TMEM2 NEB RTN4RL1 SLC2A12 OSBPL1A TMA16 NEFM MLF1 SSTR1 LOC100130417 EBF1 CTSE CSF3 OSBPL3 SLC7A11 STAT3 TMEM2 ZBTB16 HTR4 NDNF OPCML ARHGEF26-AS1 FOSL2 RILP NOS1 TLN2 PROM1 METTL7A FO…
Down-regulated (298 in total)	RPS4Y2 RPS4Y1 DDX3Y TTTY15 UTY NLGN4Y ZFY SLC44A5 TXLNGY KDM5D TTTY14 C2orf80 ANO3 GJB7 SPOCK1 ATP2B3 CLCNKA GRP EIF1AY FAM43B USP9Y EPHA5-AS1 FTCDNL1 BAIAP3 ZNF275 DDX3Y PEG3-AS1 BRINP2 TTTY10 CDC25A ZIM2 ZNF275 CLCNKB SRCIN1 EPHA5 PNMA3 NR5A1 CRYGC PEG3 SMPD3 ADCYAP1R1 RAB27B SHROOM3 XYLT1 KIF21B GYG2 LRRC3B CDC25A SLC2A13 BTC FSHB ATP2B3 SHANK2 TRIM49 XYLT1 CAMKV TSPAN1 LOXHD1 SLC2A13 GAL3ST3 …
